# Supplementary material for: Cost and operational impact of promoting upfront GeneXpert MTB/RIF test referrals for presumptive pediatric tuberculosis patients in India
Source: PLoS One. 2019 Apr 1;14(4):e0214675. doi: 10.1371/journal.pone.0214675 (PMC6443160; doi:10.1371/journal.pone.0214675)
Supplement: S2 File — (CSV) [file pone.0214675.s008.csv]

Date	Kolkata	Hyderabad	Delhi	Chennai	Grand Total
2014-04-02				4	4
2014-04-04				1	1
2014-04-07			4		4
2014-04-09				16	16
2014-04-10				16	16
2014-04-11		4		8	12
2014-04-12				2	2
2014-04-15				16	16
2014-04-16			7	4	11
2014-04-17		1	5		6
2014-04-19		4		8	12
2014-04-20		9			9
2014-04-21	4	8	5	12	29
2014-04-22		6	7	10	23
2014-04-23		21	7	12	40
2014-04-24		15	10		25
2014-04-25		16	11	12	39
2014-04-26		16	7	3	26
2014-04-27		24			24
2014-04-28		24	7	7	38
2014-04-29		12	5	7	24
2014-04-30			16	10	26
2014-05-01		16	9		25
2014-05-02		28	9	4	41
2014-05-03		47	16	4	67
2014-05-04		34			34
2014-05-05	1	21	17	10	49
2014-05-06		13	9	9	31
2014-05-07	2	39	9	4	54
2014-05-08		31	13	9	53
2014-05-09	1	11	9	4	25
2014-05-10		3	7		10
2014-05-12		22	19	5	46
2014-05-13		30	6	11	47
2014-05-14	5	13			18
2014-05-15	10	17	10	16	53
2014-05-16	11	28	3	10	52
2014-05-17	3	13	7	1	24
2014-05-19	4	15	9	13	41
2014-05-20		15	15	11	41
2014-05-21	14	16	11	11	52
2014-05-22	1	8	16	14	39
2014-05-23	10	18	15	16	59
2014-05-24	4	15	10	6	35
2014-05-25		3			3
2014-05-26	11	8	6	21	46
2014-05-27		17	7	24	48
2014-05-28	10	27	14	28	79
2014-05-29	8	16	11	28	63
2014-05-30	10	3	16	24	53
2014-05-31	16	16	20	16	68
2014-06-01	3				3
2014-06-02	7	8	14	24	53
2014-06-03	10	17	11	24	62
2014-06-04	18	12	13	24	67
2014-06-05	17	19	17	48	101
2014-06-06	25	41	16	58	140
2014-06-07	20	17	15	34	86
2014-06-09	18	3	12	48	81
2014-06-10	18	24	15	48	105
2014-06-11	20	22	19	40	101
2014-06-12	20	23	27	48	118
2014-06-13	20	20	10	49	99
2014-06-14	20	2	13	4	39
2014-06-15	4				4
2014-06-16	16	12	18	8	54
2014-06-17	22	26	14	7	69
2014-06-18	16	15	15	15	61
2014-06-19	17	14	13	10	54
2014-06-20	24	11	16	15	66
2014-06-21	20	17	29	14	80
2014-06-23	16	6	24	18	64
2014-06-24	16	17	14	8	55
2014-06-25	40	12	7	9	68
2014-06-26	40	15	16	11	82
2014-06-27	40	18	15	9	82
2014-06-28	40	6	12	8	66
2014-06-30	40	8	23	22	93
2014-07-01	40	8	14	9	71
2014-07-02	40	10	21	7	78
2014-07-03	40	18	22	9	89
2014-07-04	40	19	12	1	72
2014-07-05	22	6	16	6	50
2014-07-07	2	16	18	11	47
2014-07-08	12	19	10	23	64
2014-07-09	9	18	16	11	54
2014-07-10	18	12	25	17	72
2014-07-11	18	13	11	8	50
2014-07-12	14		17	1	32
2014-07-14	12	9	16	13	50
2014-07-15	22	26	13	4	65
2014-07-16	7	9	19	13	48
2014-07-17	18	20	17	7	62
2014-07-18	18	9	36	6	69
2014-07-19	12	4	29		45
2014-07-21	17		20	14	51
2014-07-22	12	11	12	10	45
2014-07-23	10	24	17	12	63
2014-07-24	11	9	16	15	51
2014-07-25	7	9	15	15	46
2014-07-26	9	3	14	4	30
2014-07-28	12	8	8	4	32
2014-07-29		8			8
2014-07-30	1	9	20	10	40
2014-07-31	10	14	20	2	46
2014-08-01	11	12	24	11	58
2014-08-02	10	21	20	2	53
2014-08-04	6	12	18	10	46
2014-08-05	5	20	14	1	40
2014-08-06	9	19	15	4	47
2014-08-07	4	19	18	11	52
2014-08-08	6	24	17	3	50
2014-08-09	8		16		24
2014-08-11	2	18	13	13	46
2014-08-12	10	18	19	8	55
2014-08-13	10	22	20	5	57
2014-08-14	14	20	29	15	78
2014-08-15	1	4		2	7
2014-08-16	8	8	20	7	43
2014-08-18	8	18		11	37
2014-08-19	13	7	9	4	33
2014-08-20	12	15	19	2	48
2014-08-21	12	11	24	18	65
2014-08-22	12	10	22	2	46
2014-08-23	15	27	12	5	59
2014-08-24		16			16
2014-08-25	17	8	23	10	58
2014-08-26	13	14	15	3	45
2014-08-27	11	7	24	2	44
2014-08-28	14	12	21	13	60
2014-08-29	10	3	27	1	41
2014-08-30	8	7	24	3	42
2014-09-01	4	8	20	10	42
2014-09-02	10	9	12	1	32
2014-09-03	14	15	22	9	60
2014-09-04	11	9	24	5	49
2014-09-05	10	5	23	5	43
2014-09-06	4	6	23	6	39
2014-09-07		6			6
2014-09-08	13		10	10	33
2014-09-09	8	5	13	1	27
2014-09-10	6	11	16	6	39
2014-09-11	13	11	14	12	50
2014-09-12	9	22	8	6	45
2014-09-13	5	6	17	1	29
2014-09-15	11	11	16	6	44
2014-09-16	14	21	17	3	55
2014-09-17	3	12	20	8	43
2014-09-18	6	10	9	11	36
2014-09-19	17	11	21	3	52
2014-09-20	2	23	16	5	46
2014-09-22	4	14	24	10	52
2014-09-23	3	16	11	4	34
2014-09-24	7	19	14	4	44
2014-09-25	8	17	25	8	58
2014-09-26	8	22	30	5	65
2014-09-27	3	14	19	5	41
2014-09-29	10	8	17	8	43
2014-09-30	2	30	13	3	48
2014-10-01		18	24	26	68
2014-10-02		9	5		14
2014-10-03	1				1
2014-10-04	1	7	6	4	18
2014-10-07		7	15	6	28
2014-10-08	7	8		11	26
2014-10-09	5	5	22	11	43
2014-10-10	9	11	14	4	38
2014-10-11	9	12	16	2	39
2014-10-13	6	8	21	7	42
2014-10-14	7	9	10	15	41
2014-10-15	3	5	11	11	30
2014-10-16	13	2	8	12	35
2014-10-17	8	4	27	8	47
2014-10-18	2	23	6	2	33
2014-10-20	3	8	4	2	17
2014-10-21	10	9	15	16	50
2014-10-22	4	10	12		26
2014-10-23	1			3	4
2014-10-24	6	1	11	2	20
2014-10-25	3	15	16	1	35
2014-10-27	5	12	16	5	38
2014-10-28	9	11	12	5	37
2014-10-29	8	2		7	17
2014-10-30	2	10	13	8	33
2014-10-31	7	12	10	5	34
2014-11-01	6	7	13	6	32
2014-11-03	15	15	30	6	66
2014-11-04	2			1	3
2014-11-05	10	9	13	6	38
2014-11-06	10	17			27
2014-11-07	8	16	16	7	47
2014-11-08	8		16	2	26
2014-11-10	6	13	19	16	54
2014-11-11	12	11	13	9	45
2014-11-12	9	7	19	5	40
2014-11-13	9	6	22	17	54
2014-11-14	6	16	20	4	46
2014-11-15	2	14	12	4	32
2014-11-17	5	6	16	16	43
2014-11-18	7	9	16	9	41
2014-11-19	7	4	8	15	34
2014-11-20		9	11	13	33
2014-11-21	11	14	21	3	49
2014-11-22	4	4	16	2	26
2014-11-24	11	12	14	15	52
2014-11-25	6	5	22	17	50
2014-11-26	4	16	11	16	47
2014-11-27	9	13	25	17	64
2014-11-28	10	25	16	10	61
2014-11-29	8	5	14	6	33
2014-12-01	3	13	19	7	42
2014-12-02	7	8	15	10	40
2014-12-03	7	14	16	10	47
2014-12-04	12	14	20	18	64
2014-12-05	8	21	7	7	43
2014-12-06	3	19	8	4	34
2014-12-07		1			1
2014-12-08	10	8	18	9	45
2014-12-09	6	9	14	2	31
2014-12-10	3	21	18	11	53
2014-12-11	15	18	16	8	57
2014-12-12	7	12	19	1	39
2014-12-13	3	7	13	1	24
2014-12-15	6	17	10	4	37
2014-12-16	5	13	20	5	43
2014-12-17	5	9	18	8	40
2014-12-18	4	8	18	17	47
2014-12-19	7	13	18	16	54
2014-12-20	1	13	22	5	41
2014-12-22	6	8	16	12	42
2014-12-23	7	21	17	8	53
2014-12-24	5	21	15	14	55
2014-12-25		4			4
2014-12-26	1		12	8	21
2014-12-27	4	13	5	6	28
2014-12-28		6			6
2014-12-29	12	16	13	9	50
2014-12-30	8	25	16	13	62
2014-12-31	7	17	12	10	46
2015-01-01	1	6	14	2	23
2015-01-02	3	11	15	5	34
2015-01-03	12	13	22	3	50
2015-01-05	3	2	21	5	31
2015-01-06	4	10	22	6	42
2015-01-07	4	19	22	12	57
2015-01-08	8	11	22	12	53
2015-01-09	7	19	21	11	58
2015-01-10	2		22		24
2015-01-12	5	8	25	13	51
2015-01-13	8	21	21	14	64
2015-01-14	13		20	9	42
2015-01-15	13		17		30
2015-01-16	9	9	19	4	41
2015-01-17	9	16	12	1	38
2015-01-18		2			2
2015-01-19	17	9	19	6	51
2015-01-20	4	13	24	11	52
2015-01-21	5	24	18	12	59
2015-01-22	21	13	21	24	79
2015-01-23	3	18	25	4	50
2015-01-24	6	17	21	1	45
2015-01-25		1			1
2015-01-27	4	13	22	20	59
2015-01-28	5	18	14	11	48
2015-01-29	7	10	15	24	56
2015-01-30	9	15	21	5	50
2015-01-31	5	20	14	3	42
2015-02-02	10	4	21	13	48
2015-02-03	1	12	21	15	49
2015-02-04	2	18	21	8	49
2015-02-05	3	17	28	16	64
2015-02-06	5	22	21	12	60
2015-02-07	1	24		7	32
2015-02-08		8			8
2015-02-09	6	13	21	8	48
2015-02-10	5	16	21	14	56
2015-02-11	6	10	30	15	61
2015-02-12	17	22	32	18	89
2015-02-13	3	20	24	8	55
2015-02-14	6	3	24	1	34
2015-02-16	7	16	23	14	60
2015-02-17	8	2	21	11	42
2015-02-18	16	16	24	15	71
2015-02-19	9	23	22	14	68
2015-02-20	5	20	16	12	53
2015-02-21	7	16	8	6	37
2015-02-23	8	15	32	14	69
2015-02-24	13	26	30	9	78
2015-02-25	11	16	24	21	72
2015-02-26	15	14	15	10	54
2015-02-27	9	28	24	11	72
2015-02-28	3	32	16	3	54
2015-03-01		3			3
2015-03-02	7	18	23	16	64
2015-03-03	8	25	16	7	56
2015-03-04	10	37	21	4	72
2015-03-05	1	21	22	5	49
2015-03-06		10		5	15
2015-03-07	5	16	8	4	33
2015-03-08		8			8
2015-03-09	5	12	25	8	50
2015-03-10	18	18	17	8	61
2015-03-11	10	15	22	10	57
2015-03-12	3	18	28	19	68
2015-03-13	12	11	21	3	47
2015-03-14	12	20	14	2	48
2015-03-16	10	11	28	8	57
2015-03-17	7	20	21	6	54
2015-03-18	9	27	21	15	72
2015-03-19	8	26	23	8	65
2015-03-20	8	23	25	14	70
2015-03-21	8		14	4	26
2015-03-23	6	14	21	10	51
2015-03-24	16	6	28	8	58
2015-03-25	10	12	21	21	64
2015-03-26	16	27	26	16	85
2015-03-27	12	36	12	8	68
2015-03-28	9	3		2	14
2015-03-30	6	8	21	11	46
2015-03-31	3	23	31	5	62
2015-04-01	13	19	21	4	57
2015-04-02	12	19		4	35
2015-04-03		10			10
2015-04-04	7	12	16	8	43
2015-04-05		12			12
2015-04-06	13	16	24	12	65
2015-04-07	10	19	17	15	61
2015-04-08	11	17	24	8	60
2015-04-09	9	15	15	11	50
2015-04-10	5	20	21	9	55
2015-04-11	3	5	16	7	31
2015-04-13	8	14	20	15	57
2015-04-14	4	13			17
2015-04-15		18	21	14	53
2015-04-16		22	20	3	45
2015-04-17	7	18	20	11	56
2015-04-18	8	13	24	5	50
2015-04-19		8	24		32
2015-04-20	5	11	20	16	52
2015-04-21	10	20	20	8	58
2015-04-22	15	28	20	10	73
2015-04-23	5	21	24	13	63
2015-04-24	5	24	20	10	59
2015-04-25	5	20	20	5	50
2015-04-26		1			1
2015-04-27	7	13	25	10	55
2015-04-28	8	14	20	9	51
2015-04-29	10	16	19	10	55
2015-04-30	6	16	35	12	69
2015-05-01		24	35	7	66
2015-05-02	4	14	42	3	63
2015-05-03		4	42		46
2015-05-04	10	6	35		51
2015-05-05	6	13	37	15	71
2015-05-06	11	26	40	7	84
2015-05-07	13	17	28	10	68
2015-05-08	7	23	24	4	58
2015-05-09	6	8	8	3	25
2015-05-11	8	8	40	7	63
2015-05-12	13	22	40	5	80
2015-05-13	10	16	32	5	63
2015-05-14	8	10	24	9	51
2015-05-15	8	21	32	6	67
2015-05-16	5	19	17	10	51
2015-05-17		1			1
2015-05-18	11	12	40	18	81
2015-05-19	1	22	32	11	66
2015-05-20	11	36	40	12	99
2015-05-21	1	16	40	8	65
2015-05-22	10	23	40	8	81
2015-05-23	8	10	16	3	37
2015-05-24		6			6
2015-05-25	5	14	40	7	66
2015-05-26	8	18	32	6	64
2015-05-27	7	15	32	7	61
2015-05-28	9	15	40	13	77
2015-05-29	11	25	32	11	79
2015-05-30	7	15	24	6	52
2015-05-31		3			3
2015-06-01	10	7	40	14	71
2015-06-02	20	12	40	8	80
2015-06-03	9	10	28	13	60
2015-06-04	8	14	24	9	55
2015-06-05	16	13	24	10	63
2015-06-06	2	18	16	2	38
2015-06-08	6	9	32	8	55
2015-06-09	16	10	32	8	66
2015-06-10	10	33	32	6	81
2015-06-11	15	18	24	15	72
2015-06-12	16	20	24	5	65
2015-06-13	9	3	8	5	25
2015-06-15	11	6	32	15	64
2015-06-16	5	17	40	9	71
2015-06-17	9	10	32	10	61
2015-06-18	10	10	27	14	61
2015-06-19	7	13	32	17	69
2015-06-20	5	7	8	10	30
2015-06-22	9	9	32	8	58
2015-06-23	10	17	32	17	76
2015-06-24	8	19	17	19	63
2015-06-25	13	17	24	16	70
2015-06-26	5	11	32	10	58
2015-06-27	7	8	16	3	34
2015-06-28		7			7
2015-06-29	10	5	32	18	65
2015-06-30	16	9	26	16	67
2015-07-01	9	10	32	12	63
2015-07-02	5	11	24	16	56
2015-07-03	17	12	40	9	78
2015-07-04	14	21	16	9	60
2015-07-05		3			3
2015-07-06	6	7	24	15	52
2015-07-07	5	12	32	16	65
2015-07-08	11	20	32	10	73
2015-07-09	8	13	32	11	64
2015-07-10	7	15	40	7	69
2015-07-11	17	9	16	3	45
2015-07-13	13	16	32	12	73
2015-07-14	10	14	32	11	67
2015-07-15	8	13	32	7	60
2015-07-16	10	24	32	11	77
2015-07-17	7	13	18	12	50
2015-07-18		1			1
2015-07-20	6	16	24	19	65
2015-07-21	8	24	28	13	73
2015-07-22	8	28	32	8	76
2015-07-23	6	13	32	10	61
2015-07-24	15	25	32	13	85
2015-07-25	11	9	32	4	56
2015-07-26		4	24		28
2015-07-27	5	14	32	11	62
2015-07-28	8	24	32	5	69
2015-07-29	15	38	32	17	102
2015-07-30	17	26	32		75
2015-07-31	11	17	32	26	86
2015-08-01	6	13	8	7	34
2015-08-03	13	10	24	9	56
2015-08-04	18	19	32	9	78
2015-08-05	4	12	32	15	63
2015-08-06	17	10	32	7	66
2015-08-07	16	12	40	10	78
2015-08-08	9	2	24	9	44
2015-08-10	8		40	22	70
2015-08-11	7	12	40	8	67
2015-08-12	8	28	29	9	74
2015-08-13	16	33	21	7	77
2015-08-14	7	28	24	21	80
2015-08-15		7		1	8
2015-08-17	11	7	24	27	69
2015-08-18	15	28	17	17	77
2015-08-19	11	28	32	20	91
2015-08-20	18	14	32	10	74
2015-08-21	10	14	32	22	78
2015-08-22	12	41	16	7	76
2015-08-23		3			3
2015-08-24	15	16	40	17	88
2015-08-25	14	13	32	11	70
2015-08-26	15	35	24	12	86
2015-08-27	13	14	32	8	67
2015-08-28	13	16	32	5	66
2015-08-29	22	27	8	3	60
2015-08-31	11	14	32	13	70
2015-09-01	13	27	40	12	92
2015-09-02	7	17	40	18	82
2015-09-03	15	28	40	7	90
2015-09-04	22	36	40	11	109
2015-09-05	9	8	22	5	44
2015-09-06		7			7
2015-09-07	16	8	32	10	66
2015-09-08	11	21	32	10	74
2015-09-09	11	20	33	17	81
2015-09-10	10	26	30	24	90
2015-09-11	15	30	29	21	95
2015-09-12	8		16	2	26
2015-09-14	13	24	40	14	91
2015-09-15	16	45	36	20	117
2015-09-16	16	26	25	26	93
2015-09-17	14	13	32	2	61
2015-09-18	8	10	23	13	54
2015-09-19	9	15	31		55
2015-09-21	8	25	24	30	87
2015-09-22	24	32	28	21	105
2015-09-23	7	32	30	17	86
2015-09-24	14	40	31		85
2015-09-25	1	15		23	39
2015-09-26	7		37	4	48
2015-09-28	19	22	32	22	95
2015-09-29	18	21	31	21	91
2015-09-30	14	47	40	12	113
2015-10-01	17	27	39	22	105
2015-10-02	17	23			40
2015-10-03	11	14	29	8	62
2015-10-04		10			10
2015-10-05	10	13	32	18	73
2015-10-06	11	16	29	16	72
2015-10-07	8	43	26	16	93
2015-10-08	15	40	39	5	99
2015-10-09	16	46	32	12	106
2015-10-10	6	34	14	3	57
2015-10-12	8		40	10	58
2015-10-13	14	24	40	22	100
2015-10-14	17	37	32	19	105
2015-10-15	11	56	40	13	120
2015-10-16	15	48	48	7	118
2015-10-17	8	30	40	7	85
2015-10-18		8	18		26
2015-10-19		11	38	7	56
2015-10-20		23	32	18	73
2015-10-21			48		48
2015-10-23			40	16	56
2015-10-24				3	3
2015-10-26		11	40	23	74
2015-10-27		46	2	24	72
2015-10-28		24	37	26	87
2015-10-29		19	24	14	57
2015-10-30		30	30	12	72
2015-10-31		29	36	15	80
2015-11-01		22			22
2015-11-02	7	13	32	11	63
2015-11-03	33	27	40	17	117
2015-11-04	40	31	40	17	128
2015-11-05	32	22	32	25	111
2015-11-06	20	34	26	10	90
2015-11-07	24	37	22	3	86
2015-11-08		14			14
2015-11-09	16	16	32	16	80
2015-11-10	23	34	32		89
2015-11-11	6	8		10	24
2015-11-12	10	17	16	10	53
2015-11-13	8	30	32	7	77
2015-11-14	7	7	16	9	39
2015-11-16	16	24	41	6	87
2015-11-17	12	31		10	53
2015-11-18	18	36	40	16	110
2015-11-19	8	22	32	14	76
2015-11-20	18	31	19	16	84
2015-11-21	6	24	32	7	69
2015-11-23	6	11	32	19	68
2015-11-24	8	14	40	19	81
2015-11-25	9	3	8		20
2015-11-26	4	24	24	14	66
2015-11-27	18	49	32	18	117
2015-11-28	7	39	24	24	94
2015-11-29		8			8
2015-11-30	10	10	24	30	74
2015-12-01	13	12	32	19	76
2015-12-02	8	22	32		62
2015-12-03	6	16	40		62
2015-12-04	11	38	32		81
2015-12-05	14	39	24		77
2015-12-06		8			8
2015-12-07	12	18	32	24	86
2015-12-08	9	25	32	32	98
2015-12-09	14	31	40	14	99
2015-12-10	10	48	32	23	113
2015-12-11	14	31	40	23	108
2015-12-12	7	8	32	8	55
2015-12-14	10	15	34	31	90
2015-12-15	14	32	40	34	120
2015-12-16	14	25	40	19	98
2015-12-17	7	31	40	25	103
2015-12-18	13	19	32	24	88
2015-12-19	5	20	23	13	61
2015-12-20		15			15
2015-12-21	10	10	32	18	70
2015-12-22	8	23	24	15	70
2015-12-23	24	24	40	21	109
2015-12-24	6	13			19
2015-12-26	6		33	8	47
2015-12-28	13	24	40	28	105
2015-12-29	5	40	32	26	103
2015-12-30	8	36	40	32	116
2015-12-31	6	30	32	48	116
2016-01-01	8	4	40	18	70
2016-01-02	6	16	29	12	63
2016-01-03		17			17
2016-01-04	9	14	32	9	64
2016-01-05	13	10	40	38	101
2016-01-06	10	41	40	24	115
2016-01-07	8	18	32	18	76
2016-01-08	11	23	32	25	91
2016-01-09	10	11	24	10	55
2016-01-11	8	14	40	23	85
2016-01-12	15	24	41	33	113
2016-01-13	12	25	40	37	114
2016-01-14	10	12	48	13	83
2016-01-15	13		31		44
2016-01-16	14	16	24		54
2016-01-17	2				2
2016-01-18	10	21	40	17	88
2016-01-19	12	32	48	10	102
2016-01-20	11	40	40	23	114
2016-01-21	4	17	48	12	81
2016-01-22	11	40	34	14	99
2016-01-23	6	18	24	7	55
2016-01-24		8			8
2016-01-25	14	22	39	15	90
2016-01-26	1	16			17
2016-01-27	15	18	20	24	77
2016-01-28	15	40	16	17	88
2016-01-29	12	48	24	12	96
2016-01-30	20	48	38	2	108
2016-01-31	1	15			16
2016-02-01	10	15	40	24	89
2016-02-02	12		40	12	64
2016-02-03	10	11	40	9	70
2016-02-04	12	22	48	22	104
2016-02-05	20	47	40	11	118
2016-02-06	13	15	32	17	77
2016-02-07	3	14			17
2016-02-08	15	14	40	19	88
2016-02-09	18	24	32	32	106
2016-02-10	15	47	40	29	131
2016-02-11	9	42	40	18	109
2016-02-12	8	17	40	20	85
2016-02-13	10	28	32	11	81
2016-02-15	3	14	40	20	77
2016-02-16	22	41	41	24	128
2016-02-17	19	43	48	27	137
2016-02-18	12	37	40	18	107
2016-02-19	20	30	48	13	111
2016-02-20	22	35	48	10	115
2016-02-21	4	1			5
2016-02-22	12	15	48	19	94
2016-02-23	15	18	40	22	95
2016-02-24	24	32	48	31	135
2016-02-25	21	22	40	28	111
2016-02-26	16	31	40	26	113
2016-02-27	12	27	49	19	107
2016-02-28		3			3
2016-02-29	14	14	32	35	95
2016-03-01	28	52	48	26	154
2016-03-02	30	32	49	17	128
2016-03-03	39	48	48	24	159
2016-03-04	25	40	48	19	132
2016-03-05	24	48	48	11	131
2016-03-06	8	8			16
2016-03-07	24		40	19	83
2016-03-08	40	21	48	27	136
2016-03-09	22	23	48	23	116
2016-03-10	21	44	48	14	127
2016-03-11	11	24	48	14	97
2016-03-12	28	2	56	24	110
2016-03-13			56		56
2016-03-14	16	22	49	27	114
2016-03-15	23	25	48	26	122
2016-03-16	24	22	42	26	114
2016-03-17	18	27	48	21	114
2016-03-18	24	30	48	15	117
2016-03-19	26	33	32	9	100
2016-03-20	3	12	57		72
2016-03-21	11	17	56	26	110
2016-03-22	39	33	84	26	182
2016-03-23	4	6	86	30	126
2016-03-24	15	23		16	54
2016-03-25	1	13	23		37
2016-03-26	11	24	12	16	63
2016-03-27	7	22			29
2016-03-28	19	18	60	34	131
2016-03-29	15	35	84	15	149
2016-03-30	17	40	84	17	158
2016-03-31	19	35	60	14	128
2016-04-01	18	29	44	25	116
2016-04-02	21	38	56		115
2016-04-03		10			10
2016-04-04	12	24	56	24	116
2016-04-05	28	5	48	11	92
2016-04-06	24	9	56	13	102
2016-04-07	20	49	56	11	136
2016-04-08	17	6	56	11	90
2016-04-09	20		58	5	83
2016-04-11	18	24	56	15	113
2016-04-12	22	36	56	16	130
2016-04-13	20	32	56	12	120
2016-04-14	4	15			19
2016-04-15	19			13	32
2016-04-16	23	19	40	2	84
2016-04-17		14			14
2016-04-18	15	19	56	20	110
2016-04-19	15	32	56	15	118
2016-04-20	23	23			46
2016-04-21	4	16	8	17	45
2016-04-22	16	29		35	80
2016-04-23	27	27		24	78
2016-04-24		15			15
2016-04-25	10	11		33	54
2016-04-26	16	31		11	58
2016-04-27	24	32		9	65
2016-04-28	20	23		14	57
2016-04-29	22	23		15	60
2016-04-30	14	16		2	32
2016-05-02	12	27	64	13	116
2016-05-03	13	21	64	10	108
2016-05-04	11	24	64		99
2016-05-05	18	24	64	17	123
2016-05-06	16	31	64	21	132
2016-05-07	8	33	48	12	101
2016-05-09	19	32	64	29	144
2016-05-10	18	33	64	20	135
2016-05-11	16	20	80	20	136
2016-05-12	14	22	80	35	151
2016-05-13	16	26	71	25	138
2016-05-14	10		53	7	70
2016-05-16	14	32	62		108
2016-05-17	13	29	62	21	125
2016-05-18	22	24	52	12	110
2016-05-19	16	40	47	11	114
2016-05-20	12	32	64	22	130
2016-05-21	7	30		4	41
2016-05-23	16	19	67	19	121
2016-05-24	15	26	64	26	131
2016-05-25	19	24	75	12	130
2016-05-26	16	18	48	25	107
2016-05-27	16	32	48	10	106
2016-05-28	8	21	48	3	80
2016-05-30	14	19	63	15	111
2016-05-31	13	20	64	13	110
2016-06-01	12	22	64	19	117
2016-06-02	17		74	26	117
2016-06-03	12	40	56	13	121
2016-06-04	14	29	30	3	76
2016-06-06	24	21	60	22	127
2016-06-07	11	23	60	27	121
2016-06-08	16	21	80	24	141
2016-06-09	17	32	64	21	134
2016-06-10	5	32	46	19	102
2016-06-11	8		47	4	59
2016-06-13	16	25	66	26	133
2016-06-14	18	26	80	34	158
2016-06-15	21	14	48	24	107
2016-06-16	17	30	64	34	145
2016-06-17	14	21	64	24	123
2016-06-18	13	23	46		82
2016-06-20	20	23	57	48	148
2016-06-21	22	29	49	26	126
2016-06-22	21	30	42	28	121
2016-06-23	20	34	48	20	122
2016-06-24	10	27	46	29	112
2016-06-25		20	37	4	61
2016-06-27		25	61	25	111
2016-06-28		19	64	28	111
2016-06-29		34	46	29	109
2016-06-30	19	39	48	33	139
